# Supplementary material
Source: PubMed Central journal article supplement (PMC6422044)
Supplement: NIHMS1518506-supplement-Supplemental_Material.pdf [file NIHMS1518506-supplement-Supplemental_Material.pdf]

## Supplemental Material

### Regional variation in *RBM20* causes a highly penetrant arrhythmogenic cardiomyopathy

#### Supplemental Methods

##### *Justification for use of position-specific unique variants rather than frequency in registry and population*

The lack of complete patient and haplotype-specific genomic data in the *RBM20* variant database precludes formal assessment for the effect of linkage disequilibrium and relatedness on our findings. To eliminate the possibility that relatedness lead to over-representation of variants due to cascade screening or the same variant in multiple distantly-related families, we counted each variant as a single observation rather than each patient carrying a given variant. For example, if two patients were reported from separate testing companies with the same variant (e.g., c.1901G>A), these were not counted individually, rather that variant was recorded as having been observed in the appropriate population at position c.1901. This was necessary for two reasons: First, because the data was collected anonymously from testing laboratories and ClinVar, we have no way of knowing how many cardiomyopathy patients were tested to reveal the observed variants in *RBM20*. Second, as genetic testing is enriched for related individuals, large kindreds well connected to the healthcare system could bias our results toward areas of the transcript in which large families harbor single variants.

##### *Optimization of window size in gene-wide comparison of regional variant frequency*

We first attempted to identify exons particularly enriched for cardiomyopathy-associated variants, however, there was no significant enrichment for cardiomyopathy-associated variants in any exon, leading us to speculate that regional concentration, if it existed, was more likely to be found at a more granular level than exons. We therefore hypothesized that smaller serial sliding windows, agnostic to the location of known protein domains, would be preferable for identification of cardiomyopathy-enriched domains. We avoided dividing the transcript based on known functional domains in order to allow for the discovery of novel impactful regions of the transcript, while preserving assessment of the pathogenicity of known functional domains associated with these windows.

We divided the ~3700 bp coding transcript into windows of 40 and 8 bp each (resulting in 93 and 462 windows respectively) along the length of the transcript. We initially tested these two window sizes (approximately 1/100th and 1/500th the length of the transcript) in order to optimize window specificity with the relatively small size of our population. The 40 bp windows were large enough to ensure enough observations within windows to identify statistically significant enrichment while at the same time preserving spatial specificity, whereas too few 8 bp windows contained observations sufficient to reach a valid conclusion.

##### *Definitions of Clinical Characteristics of the *RBM20* registry*

Presence or absence of arrhythmia was defined as any documented non-sustained ventricular tachycardia (NSVT), atrial fibrillation (AF) whether by chart review, long term rhythm monitoring or device interrogation. Sudden cardiac arrest (SCA) was defined by report of sudden cardiac arrest by chart review (as defined by ACC/AHA/HRS definition<sup>1</sup>, and appropriate ICD discharge was defined as either shock or anti-tachycardia pacing appropriate for underlying rhythm (also collected by chart review). For comparison to report of ventricular tachycardia in the previously published DCM cohort, “evidence of ventricular arrhythmia” in the *RBM20* cohort was defined as either SCA, appropriate ICD discharge or both.

Ejection fraction by echo and MRI were collected by chart review at each independent center and were not centrally adjudicated. Family history of dilated cardiomyopathy (DCM) or sudden cardiac death (SCD) were defined as reported family history in first, second or third degree relative (i.e., parents, grandparents, aunts, uncles or first cousins). Of probands in the registry, two also harbored likely pathogenic variants in *MYH6* and *DES* (as classified by their contributing institution). While these patients both had a family history of cardiomyopathy, they did not have a family history of SCD, nor did they have personal history of arrhythmia including AF, ICD discharge or SCA.

## References

1. Al-Khatib SM., Stevenson WG., Ackerman MJ., et al. 2017 AHA/ACC/HRS Guideline for Management of Patients With Ventricular Arrhythmias and the Prevention of Sudden Cardiac Death: Executive Summary: A Report of the American College of Cardiology/American Heart Association Task Force on Clinical Practice Guidelines and the Heart Rhythm Society. Heart Rhythm 2017. Doi: 10.1016/j.hrthm.2017.10.035.

## Supplemental Tables

**Supplemental Table 1.** Variants included in *RBM20* cardiomyopathy-associated variant database

| Contributor | cDNA effect     | Protein effect | Exon |
|-------------|-----------------|----------------|------|
| ClinVAR     | 32C>T           | Ala11Val       | 1    |
| ClinVAR     | 42C>G           | Ser14Arg       | 1    |
| ClinVAR     | 224C>T          | Ser75Leu       | 2    |
| ClinVAR     | 304C>T          | Arg102Trp      | 2    |
| ClinVAR     | 488G>A          | Arg163Gln      | 2    |
| ClinVAR     | 532C>T          | Arg178Ter      | 2    |
| ClinVAR     | 533G>C          | Arg178Pro      | 2    |
| ClinVAR     | 611C>T          | Pro204Leu      | 2    |
| ClinVAR     | 674C>T          | Thr225Ile      | 2    |
| ClinVAR     | 1019C>T         | Pro340Leu      | 2    |
| ClinVAR     | 1040A>G         | Tyr347Cys      | 2    |
| ClinVAR     | 1156C>T         | Gln386Ter      | 2    |
| ClinVAR     | 1183C>T         | Gln395Ter      | 2    |
| ClinVAR     | 1281G>A         | Trp427Ter      | 3    |
| ClinVAR     | 1348C>T         | Arg 450Trp     | 4    |
| ClinVAR     | 1603G>A         | Val535Ile      | 6    |
| ClinVAR     | 1606A>G         | Ile536Val      | 6    |
| ClinVAR     | 1607T>C         | Ile536Thr      | 6    |
| ClinVAR     | 1748G>A         | Gly583Asp      | 7    |
| ClinVAR     | 1769T>G         | Met590Arg      | 7    |
| ClinVAR     | 1807G>A         | Gly603Arg      | 8    |
| ClinVAR     | 1867C>T         | Arg623Trp      | 8    |
| ClinVAR     | 1909A>G         | Ser637Gly      | 9    |
| ClinVAR     | 1909_1911delAGT |                | 9    |
| ClinVAR     | 1910G>A         | Ser637Asn      | 9    |
| ClinVAR     | 1913C>G         | Pro638Arg      | 9    |
| ClinVAR     | 2014G>A         | Gly672Ser      | 9    |
| ClinVAR     | 2062C>T         | Arg688Ter      | 9    |
| ClinVAR     | 2089G>A         | Gly697Arg      | 9    |
| ClinVAR     | 2158A>G         | Lys720Glu      | 9    |
| ClinVAR     | 2173G>A         | Glu725Lys      | 9    |
| ClinVAR     | 2219C>T         | Ser740Phe      | 9    |

|         |                        |                |    |
|---------|------------------------|----------------|----|
| ClinVAR | 2231A>T                | Asn744Ile      | 9  |
| ClinVAR | 2287G>A                | Glu763Lys      | 9  |
| ClinVAR | 2299A>C                | Lys767Gln      | 9  |
| ClinVAR | 2303C>G                | Ser768Trp      | 9  |
| ClinVAR | 2338G>C                | Gly780Arg      | 9  |
| ClinVAR | 2359G>A                | Glu787Lys      | 9  |
| ClinVAR | 2393C>T                | Pro798Leu      | 9  |
| ClinVAR | 2501dupA               | Asp834Glu      | 9  |
| ClinVAR | 2588C>G                | Pro863Arg      | 10 |
| ClinVAR | 2662G>A                | Asp888Asn      | 11 |
| ClinVAR | 2736C>A                | Asp912Glu      | 11 |
| ClinVAR | 2869C>G                | Leu957Val      | 11 |
| ClinVAR | 2986G>T                | Asp996Tyr      | 11 |
| ClinVAR | 3023G>C                | Arg1008Pro     | 11 |
| ClinVAR | 3046G>A                | Gly1016Ser     | 11 |
| ClinVAR | 3047G>C                | Gly1016Ala     | 11 |
| ClinVAR | 3067G>T                | Asp1023Tyr     | 11 |
| ClinVAR | 3331G>T                | Val1111Leu     | 12 |
| ClinVAR | 3464T>C                | Val1155Ala     | 13 |
| ClinVAR | 3496T>C                | Cys1166Arg     | 13 |
| ClinVAR | 3632C>T                | Pro1211Leu     | 14 |
| ClinVAR | 3677 A>G               | Lys1226Arg     | 14 |
| Invitae | 138_149dupGCCGCCCCAGCC | Gln49_Pro52dup | 1  |
| Invitae | 247C>A                 | Leu83Ile       | 2  |
| Invitae | 299T>G                 | Leu100Arg      | 2  |
| Invitae | 352A>G                 | Thr118Ala      | 2  |
| Invitae | 434G>A                 | Gly145Asp      | 2  |
| Invitae | 442G>A                 | Gly148Ser      | 2  |
| Invitae | 613C>A                 | Gln205Lys      | 2  |
| Invitae | 710G>T                 | Gly237Val      | 2  |
| Invitae | 761C>T                 | Ser254Leu      | 2  |
| Invitae | 1100G>A                | Arg367Gln      | 2  |
| Invitae | 1160C>T                | Ala387Val      | 2  |
| Invitae | 1451C>T                | Thr484Ile      | 5  |
| Invitae | 1511C>T                | Ala504Val      | 5  |
| Invitae | 1543G>A                | Gly515Arg      | 6  |
| Invitae | 1552C>T                | Arg518Cys      | 6  |
| Invitae | 1766G>A                | Arg589Gln      | 7  |
| Invitae | 1784A>G                | Lys595Arg      | 7  |
| Invitae | 1900C>T                | Arg634Trp      | 9  |
| Invitae | 1901G>A                | Arg634Gln      | 9  |
| Invitae | 1922G>A                | Arg641Gln      | 9  |
| Invitae | 1988G>A                | Gly663Asp      | 9  |

|         |               |                   |    |
|---------|---------------|-------------------|----|
| Invitae | 2018G>A       | Arg673Gln         | 9  |
| Invitae | 2069C>T       | Pro690Leu         | 9  |
| Invitae | 2131C>T       | Arg711Cys         | 9  |
| Invitae | 2551G>A       | Ala851Thr         | 10 |
| Invitae | 2565A>C       | Glu855Asp         | 10 |
| Invitae | 3076G>A       | Glu1026Lys        | 11 |
| Invitae | 3119C>G       | Ala1040Gly        | 11 |
| Invitae | 3245T>G       | Leu1082Arg        | 11 |
| Invitae | 3268A>T       | Ile1090Phe        | 11 |
| Invitae | 3330C>G       | Tyr1110*          | 12 |
| Invitae | 3331G>A       | Val1111Met        | 12 |
| Invitae | 3545G>A       | Arg1182His        | 13 |
| Invitae | 3564G>C       | Arg1188Ser        | 13 |
| Invitae | 3584C>A       | Ser1195Tyr        | 14 |
| Invitae | 3595G>A       | Glu1199Lys        | 14 |
| LMM     | 56C>G         | Pro19Arg          | 1  |
| LMM     | 128_130dupAGC | Gln43_Pro44insGln | 1  |
| LMM     | 131C>A        | Pro44Gln          | 1  |
| LMM     | 136C>T        | Pro46Ser          | 1  |
| LMM     | 364C>A        | Gln122Lys         | 2  |
| LMM     | 441C>A        | His147Gln         | 2  |
| LMM     | 448G>A        | Ala150Thr         | 2  |
| LMM     | 517C>A        | Pro173Thr         | 2  |
| LMM     | 529A>T        | Thr177Ser         | 2  |
| LMM     | 530C>T        | Thr177Ile         | 2  |
| LMM     | 530C>G        | Thr177Arg         | 2  |
| LMM     | 536G>A        | Gly179Asp         | 2  |
| LMM     | 544C>A        | Pro182Thr         | 2  |
| LMM     | 680G>T        | Gly227Val         | 2  |
| LMM     | 695G>A        | Gly232Asp         | 2  |
| LMM     | 746G>T        | Gly249Val         | 2  |
| LMM     | 850G>A        | Gly284Arg         | 2  |
| LMM     | 925G>A        | Gly309Arg         | 2  |
| LMM     | 1013T>C       | Met338Thr         | 2  |
| LMM     | 1024C>A       | Pro342Thr         | 2  |
| LMM     | 1051G>C       | Asp351His         | 2  |
| LMM     | 1093G>A       | Gly365Arg         | 2  |
| LMM     | 1190A>C       | His397Pro         | 2  |
| LMM     | 1259A>G       | Lys420Arg         | 2  |
| LMM     | 1286T>C       | Leu429Pro         | 3  |
| LMM     | 1329C>G       | Phe443Leu         | 3  |
| LMM     | 1364C>T       | Ser455Leu         | 4  |
| LMM     | 1418C>T       | Ala473Val         | 4  |

|     |                    |                  |    |
|-----|--------------------|------------------|----|
| LMM | 1459G>A            | Val487Met        | 5  |
| LMM | 1494C>A            | Ser498Arg        | 5  |
| LMM | 1519G>A            | Gly507Arg        | 5  |
| LMM | 1529T>C            | Phe510Ser        | 6  |
| LMM | 1538G>A            | Arg513Gln        | 6  |
| LMM | 1633G>A            | Val545Ile        | 6  |
| LMM | 1769T>A            | Met590Lys        | 7  |
| LMM | 1779A>T            | Arg593Ser        | 7  |
| LMM | 1816G>A            | Val606Met        | 8  |
| LMM | 1906C>T            | Arg636Cys        | 9  |
| LMM | 1906C>A            | Arg636Ser        | 9  |
| LMM | 1907G>A            | Arg636His        | 9  |
| LMM | 1913C>T            | Pro638Leu        | 9  |
| LMM | 1958C>T            | Thr653Ile        | 9  |
| LMM | 1973C>G            | Ser658Cys        | 9  |
| LMM | 2017C>T            | Arg673Trp        | 9  |
| LMM | 2108G>A            | Arg703Lys        | 9  |
| LMM | 2116C>A            | Pro706Thr        | 9  |
| LMM | 2147G>A            | Arg716Gln        | 9  |
| LMM | 2161G>T            | Ala721Ser        | 9  |
| LMM | 2183_2185delAAG    | Glu728del        | 9  |
| LMM | 2201G>A            | Arg734Gln        | 9  |
| LMM | 2213C>T            | Pro738Leu        | 9  |
| LMM | 2286_2287insA      | Glu763ArgfsX38   | 9  |
| LMM | 2303C>T            | Ser768Leu        | 9  |
| LMM | 2303G>C            | Trp768Ser        | 9  |
| LMM | 2318A>G            | Lys773Arg        | 9  |
| LMM | 2333C>T            | Ala778Val        | 9  |
| LMM | 2338G>A            | Gly780Arg        | 9  |
| LMM | 2357A>G            | Asp786Gly        | 9  |
| LMM | 2452G>T            | Ala818Ser        | 9  |
| LMM | 2565_2570delACAGGA | Gln856_Glu857del | 10 |
| LMM | 2679T>G            | Ser893Arg        | 11 |
| LMM | 2723T>C            | Leu908Pro        | 11 |
| LMM | 2727_2741del       | Thr910_Val914del | 11 |
| LMM | 2728A>C            | Thr910Pro        | 11 |
| LMM | 2737G>A            | Glu913Lys        | 11 |
| LMM | 2746G>A            | Glu916Lys        | 11 |
| LMM | 2761A>G            | Ile921Val        | 11 |
| LMM | 2855C>T            | Thr952Ile        | 11 |
| LMM | 2887A>G            | Lys963Glu        | 11 |
| LMM | 3004C>G            | Leu1002Val       | 11 |
| LMM | 3022C>T            | Arg1008Trp       | 11 |

|     |                  |                 |    |
|-----|------------------|-----------------|----|
| LMM | 3031G>A          | Ala1011Thr      | 11 |
| LMM | 3115C>T          | Pro1039Ser      | 11 |
| LMM | 3170G>A          | Arg1057Gln      | 11 |
| LMM | 3261_3262delinsG | Ser1087ArgfsX17 | 11 |
| LMM | 3265C>G          | Pro1089Ala      | 11 |
| LMM | 3265C>A          | Pro1089Thr      | 11 |
| LMM | 3373G>A          | Glu1125Lys      | 12 |
| LMM | 3500G>T          | Gly1167Val      | 13 |
| LMM | 3623C>T          | Ala1208Val      | 14 |
| LMM | 3667G>C          | Glu1223Gln      | 14 |

**Supplemental Table 2.** Regional Odds of Presence of Cardiomyopathy Associated Variants: 40-basepair windows ranked by statistical significance.

| Last Position of 40 bp Window | Number of gnomAD Variants in Window (of 604 variants) | Number of RBM20 CM Database Variants in Window (of 171 variants) | Odds Ratio | 95% CI Upper Bound | 95% CI Lower Bound | p-value  | FDR 20%           |
|-------------------------------|-------------------------------------------------------|------------------------------------------------------------------|------------|--------------------|--------------------|----------|-------------------|
| 1920                          | 8                                                     | 10                                                               | 4.627329   | 13.69374           | 1.610866           | 0.001786 | <b>0.00212766</b> |
| 2760                          | 2                                                     | 6                                                                | 10.94545   | 111.3944           | 1.926553           | 0.002009 | <b>0.00425532</b> |
| 1640                          | 3                                                     | 4                                                                | 4.798403   | 32.98772           | 0.80121            | 0.045823 | 0.00638298        |
| 560                           | 11                                                    | 7                                                                | 2.300998   | 6.610314           | 0.742993           | 0.08915  |                   |
| 2360                          | 7                                                     | 5                                                                | 2.568847   | 9.525956           | 0.633437           | 0.150517 |                   |
| 1800                          | 8                                                     | 5                                                                | 2.243976   | 7.889678           | 0.569084           | 0.174615 |                   |
| 1520                          | 4                                                     | 3                                                                | 2.678571   | 15.97456           | 0.387998           | 0.184471 |                   |
| 120                           | 8                                                     | 0                                                                | 0          | 1.683808           | 0                  | 0.210864 |                   |
| 2840                          | 8                                                     | 0                                                                | 0          | 1.683808           | 0                  | 0.210864 |                   |
| 2400                          | 14                                                    | 1                                                                | 0.247899   | 1.653967           | 0.005829           | 0.211719 |                   |
| 1040                          | 7                                                     | 4                                                                | 2.042772   | 8.139503           | 0.432811           | 0.2715   |                   |
| 2320                          | 15                                                    | 7                                                                | 1.676016   | 4.45548            | 0.567835           | 0.295199 |                   |
| 1480                          | 3                                                     | 2                                                                | 2.370809   | 20.84058           | 0.196268           | 0.305305 |                   |
| 2240                          | 8                                                     | 4                                                                | 1.784431   | 6.753425           | 0.388109           | 0.310795 |                   |
| 920                           | 6                                                     | 0                                                                | 0          | 2.254026           | 0                  | 0.347903 |                   |
| 2280                          | 6                                                     | 0                                                                | 0          | 2.254026           | 0                  | 0.347903 |                   |
| 3160                          | 7                                                     | 0                                                                | 0          | 1.928344           | 0                  | 0.357769 |                   |
| 3240                          | 7                                                     | 0                                                                | 0          | 1.928344           | 0                  | 0.357769 |                   |
| 440                           | 1                                                     | 1                                                                | 3.547059   | 278.87             | 0.044925           | 0.392828 |                   |
| 3360                          | 6                                                     | 3                                                                | 1.779762   | 8.430651           | 0.284807           | 0.421815 |                   |
| 800                           | 10                                                    | 1                                                                | 0.349412   | 2.489807           | 0.008005           | 0.471428 |                   |
| 880                           | 11                                                    | 1                                                                | 0.317112   | 2.212647           | 0.007325           | 0.480367 |                   |
| 1760                          | 11                                                    | 1                                                                | 0.317112   | 2.212647           | 0.007325           | 0.480367 |                   |
| 1560                          | 9                                                     | 4                                                                | 1.5835     | 5.75688            | 0.351704           | 0.498229 |                   |

|      |    |   |          |          |          |          |  |
|------|----|---|----------|----------|----------|----------|--|
| 3080 | 9  | 4 | 1.5835   | 5.75688  | 0.351704 | 0.498229 |  |
| 240  | 2  | 1 | 1.770588 | 34.17236 | 0.029838 | 0.527144 |  |
| 280  | 2  | 1 | 1.770588 | 34.17236 | 0.029838 | 0.527144 |  |
| 1280 | 2  | 1 | 1.770588 | 34.17236 | 0.029838 | 0.527144 |  |
| 2520 | 2  | 1 | 1.770588 | 34.17236 | 0.029838 | 0.527144 |  |
| 2000 | 13 | 2 | 0.538006 | 2.41391  | 0.058427 | 0.542003 |  |
| 1000 | 4  | 0 | 0        | 3.393948 | 0        | 0.581045 |  |
| 2640 | 4  | 0 | 0        | 3.393948 | 0        | 0.581045 |  |
| 3320 | 4  | 0 | 0        | 3.393948 | 0        | 0.581045 |  |
| 200  | 5  | 0 | 0        | 2.710279 | 0        | 0.591777 |  |
| 840  | 5  | 0 | 0        | 2.710279 | 0        | 0.591777 |  |
| 1240 | 5  | 0 | 0        | 2.710279 | 0        | 0.591777 |  |
| 320  | 4  | 2 | 1.775148 | 12.49603 | 0.159162 | 0.618285 |  |
| 2880 | 4  | 2 | 1.775148 | 12.49603 | 0.159162 | 0.618285 |  |
| 3120 | 4  | 2 | 1.775148 | 12.49603 | 0.159162 | 0.618285 |  |
| 640  | 5  | 2 | 1.417751 | 8.748432 | 0.133818 | 0.653114 |  |
| 1120 | 5  | 2 | 1.417751 | 8.748432 | 0.133818 | 0.653114 |  |
| 1320 | 5  | 2 | 1.417751 | 8.748432 | 0.133818 | 0.653114 |  |
| 1360 | 5  | 2 | 1.417751 | 8.748432 | 0.133818 | 0.653114 |  |
| 1840 | 5  | 2 | 1.417751 | 8.748432 | 0.133818 | 0.653114 |  |
| 2720 | 5  | 2 | 1.417751 | 8.748432 | 0.133818 | 0.653114 |  |
| 680  | 6  | 2 | 1.179487 | 6.67172  | 0.1154   | 0.691313 |  |
| 1960 | 6  | 2 | 1.179487 | 6.67172  | 0.1154   | 0.691313 |  |
| 2680 | 6  | 2 | 1.179487 | 6.67172  | 0.1154   | 0.691313 |  |
| 360  | 8  | 1 | 0.438235 | 3.309946 | 0.009819 | 0.692118 |  |
| 2480 | 8  | 1 | 0.438235 | 3.309946 | 0.009819 | 0.692118 |  |
| 3200 | 8  | 1 | 0.438235 | 3.309946 | 0.009819 | 0.692118 |  |
| 3000 | 9  | 1 | 0.388889 | 2.843536 | 0.008821 | 0.700056 |  |
| 2600 | 8  | 3 | 1.330357 | 5.617975 | 0.224798 | 0.714389 |  |
| 480  | 9  | 3 | 1.180556 | 4.801863 | 0.203299 | 0.733081 |  |
| 2120 | 9  | 3 | 1.180556 | 4.801863 | 0.203299 | 0.733081 |  |
| 2160 | 9  | 3 | 1.180556 | 4.801863 | 0.203299 | 0.733081 |  |
| 2200 | 9  | 3 | 1.180556 | 4.801863 | 0.203299 | 0.733081 |  |
| 3680 | 12 | 2 | 0.583826 | 2.662827 | 0.062907 | 0.745826 |  |
| 160  | 11 | 4 | 1.291236 | 4.4343   | 0.295969 | 0.752423 |  |
| 3040 | 12 | 4 | 1.181637 | 3.963322 | 0.274155 | 0.762646 |  |
| 960  | 5  | 1 | 0.704706 | 6.361082 | 0.014813 | 1        |  |
| 1440 | 5  | 1 | 0.704706 | 6.361082 | 0.014813 | 1        |  |
| 1880 | 5  | 1 | 0.704706 | 6.361082 | 0.014813 | 1        |  |
| 3560 | 5  | 1 | 0.704706 | 6.361082 | 0.014813 | 1        |  |
| 80   | 7  | 2 | 1.009298 | 5.357961 | 0.101404 | 1        |  |
| 520  | 7  | 2 | 1.009298 | 5.357961 | 0.101404 | 1        |  |
| 1160 | 7  | 2 | 1.009298 | 5.357961 | 0.101404 | 1        |  |
| 2080 | 7  | 2 | 1.009298 | 5.357961 | 0.101404 | 1        |  |
| 1680 | 1  | 0 | 0        |          | 0        | 1        |  |
| 3720 | 1  | 0 | 0        |          | 0        | 1        |  |
| 2800 | 7  | 1 | 0.501681 | 3.951525 | 0.011067 | 1        |  |
| 720  | 10 | 2 | 0.702959 | 3.346267 | 0.074233 | 1        |  |
| 3520 | 8  | 2 | 0.881657 | 4.475896 | 0.090408 | 1        |  |

|      |    |   |          |          |          |   |
|------|----|---|----------|----------|----------|---|
| 40   | 4  | 1 | 0.882353 | 8.992929 | 0.017813 | 1 |
| 760  | 4  | 1 | 0.882353 | 8.992929 | 0.017813 | 1 |
| 2920 | 4  | 1 | 0.882353 | 8.992929 | 0.017813 | 1 |
| 1200 | 9  | 2 | 0.78238  | 3.832357 | 0.081539 | 1 |
| 3640 | 9  | 2 | 0.78238  | 3.832357 | 0.081539 | 1 |
| 600  | 3  | 0 | 0        | 4.53231  | 0        | 1 |
| 1600 | 3  | 0 | 0        | 4.53231  | 0        | 1 |
| 1720 | 3  | 0 | 0        | 4.53231  | 0        | 1 |
| 2440 | 3  | 0 | 0        | 4.53231  | 0        | 1 |
| 2960 | 3  | 0 | 0        | 4.53231  | 0        | 1 |
| 3440 | 3  | 0 | 0        | 4.53231  | 0        | 1 |
| 3280 | 17 | 5 | 1.040043 | 2.992977 | 0.295571 | 1 |
| 3600 | 13 | 3 | 0.811813 | 3.003051 | 0.146745 | 1 |
| 3400 | 3  | 1 | 1.178431 | 14.7794  | 0.022318 | 1 |
| 2040 | 12 | 3 | 0.880952 | 3.316867 | 0.157768 | 1 |
| 400  | 6  | 1 | 0.586275 | 4.88565  | 0.012672 | 1 |
| 1080 | 6  | 1 | 0.586275 | 4.88565  | 0.012672 | 1 |
| 1400 | 6  | 1 | 0.586275 | 4.88565  | 0.012672 | 1 |
| 2560 | 6  | 1 | 0.586275 | 4.88565  | 0.012672 | 1 |
| 3480 | 6  | 1 | 0.586275 | 4.88565  | 0.012672 | 1 |
